# Supplementary material for: A free-standing, flexible and bendable lithium-ion anode materials with improved performance
Source: Royal Society of Chemistry journal article supplement (doi:10.1039/c6ra19347a), 2016-01-01
Supplement: c6ra19347a1.pdf [file c6ra19347a1.pdf]

## Supplementary Information

### **A free-standing, flexible and bendable lithium-ion anode materials with improved performance**

Xueqian Zhang,<sup>a</sup> Xiaoxiao Huang,<sup>\*a</sup> Yingfei Zhang,<sup>a</sup> Long Xia,<sup>b</sup> Bo Zhong,<sup>b</sup> Xiaodong Zhang,<sup>b</sup> Nan Tian,<sup>a</sup> Tao Zhang,<sup>b</sup> Guangwu Wen<sup>\*ab</sup>

<sup>a</sup>School of Materials Science and Engineering, Harbin Institute of Technology, Harbin 150001, China

<sup>b</sup>School of Materials Science and Engineering, Harbin Institute of Technology at Weihai, Weihai 264209, China

\*Corresponding author:

E-mail address: swliza@hit.edu.cn; g.wen@hit.edu.cn.

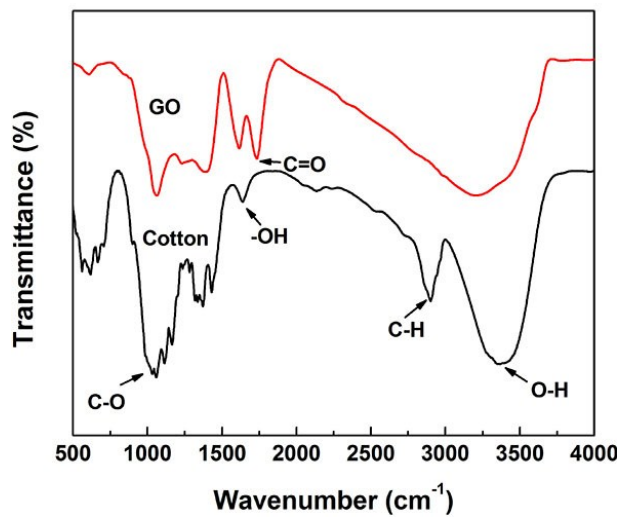

Fig. S1 FT-IR spectra of GO and non-woven cotton.

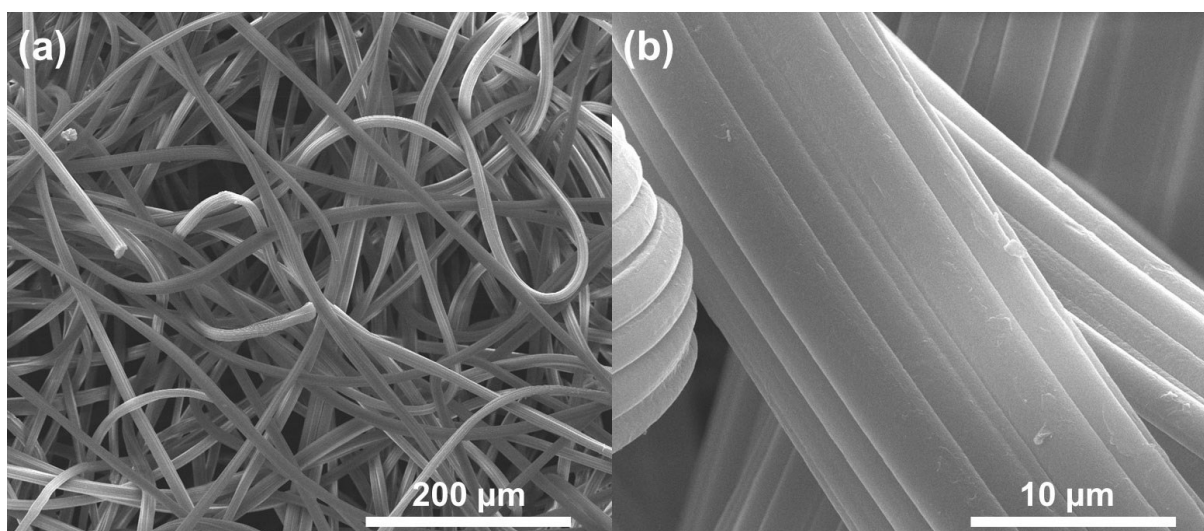

Fig. S2 SEM images of non-woven cotton low (a) and high (b) magnification.

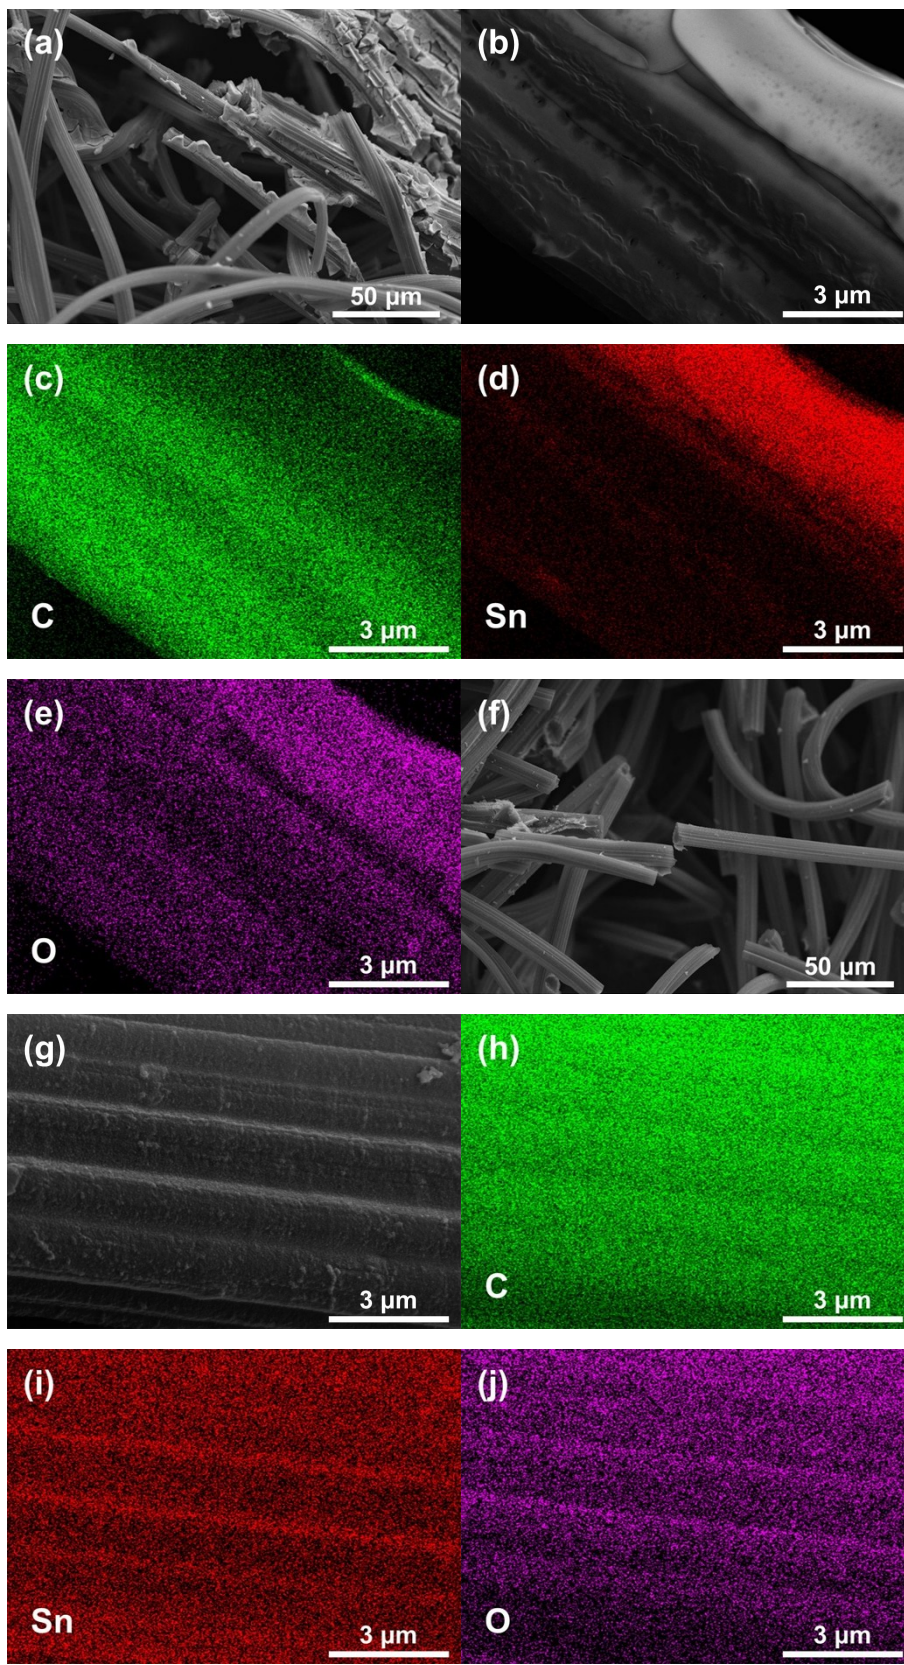

Fig. S3 SEM images and EDS mapping of the C/SnO<sub>2</sub> (a-e), CG/SnO<sub>2</sub> (f-j).

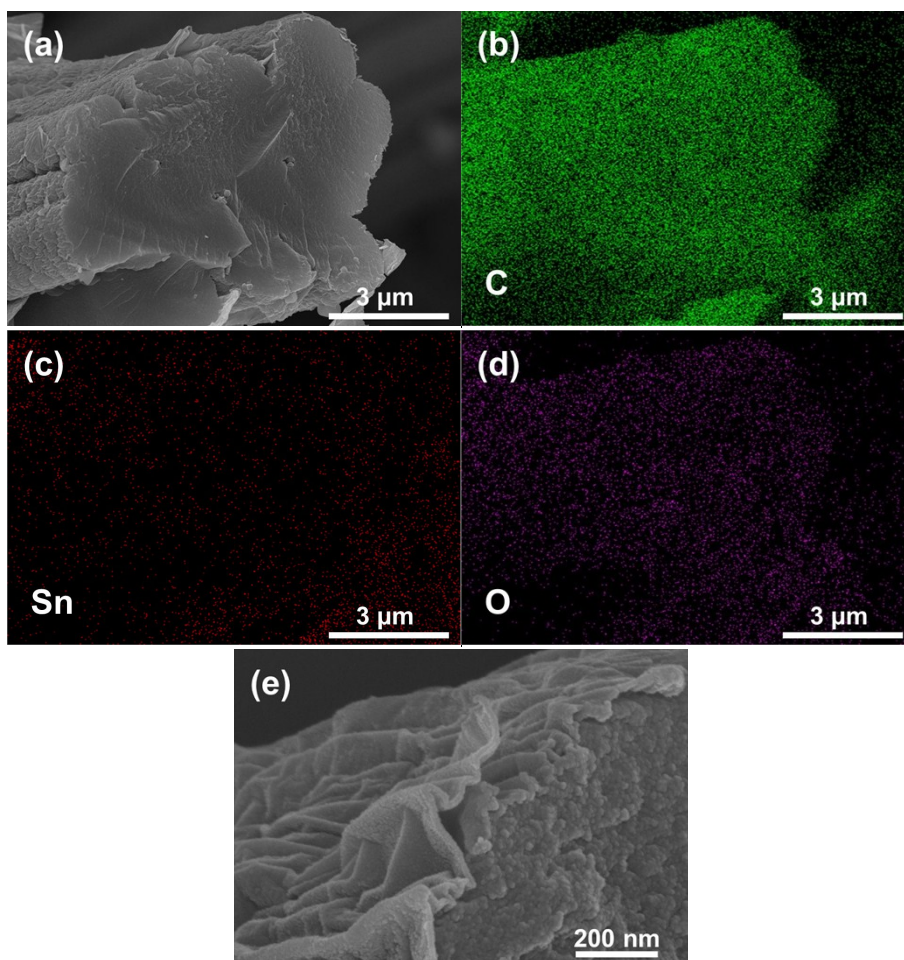

**Fig. S4** SEM images of CGN/SnO<sub>2</sub> in cross section low (a), EDS mapping of C (b), Sn (c), O element (d), and cross high magnification (e).

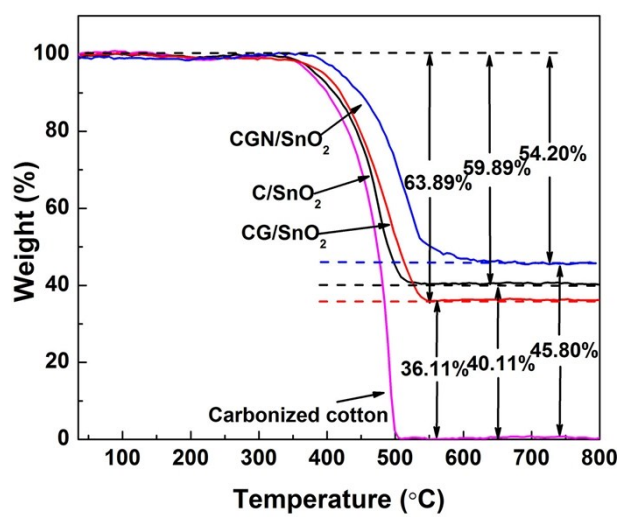

**Fig. S5** TGA curves of the cotton, C/SnO<sub>2</sub>, CG/SnO<sub>2</sub>, and CGN/SnO<sub>2</sub> composites.

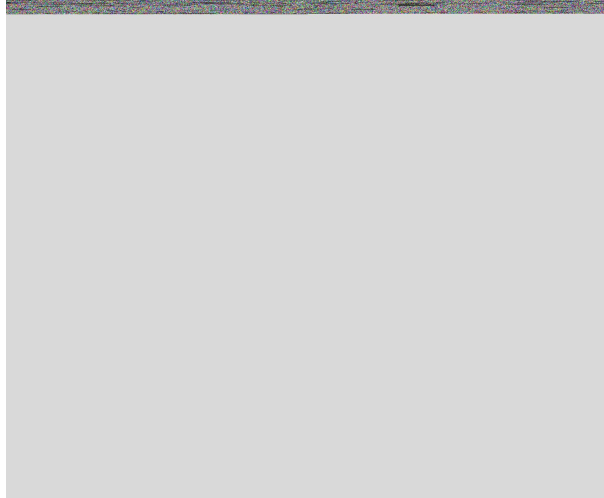

**Fig. S6** Cycling performance of carbonized cotton, CG, and CGN.

The cycling performance of carbonized cotton, CG, and CGN at  $50 \text{ mAh g}^{-1}$  in the voltage range of 0.001-3 V. As shown in Fig. S6, after 60 cycles, the capacities of carbonized cotton, CG, and CGN are 149.1, 91.5, and  $176.9 \text{ mAh g}^{-1}$ .

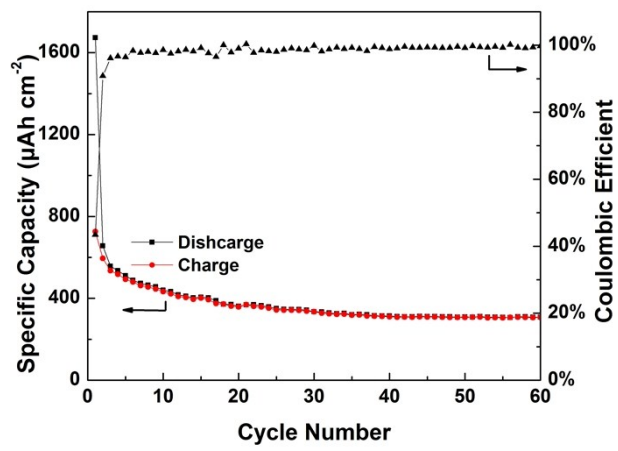

**Fig. S7** Cycling performance of CGN composite.

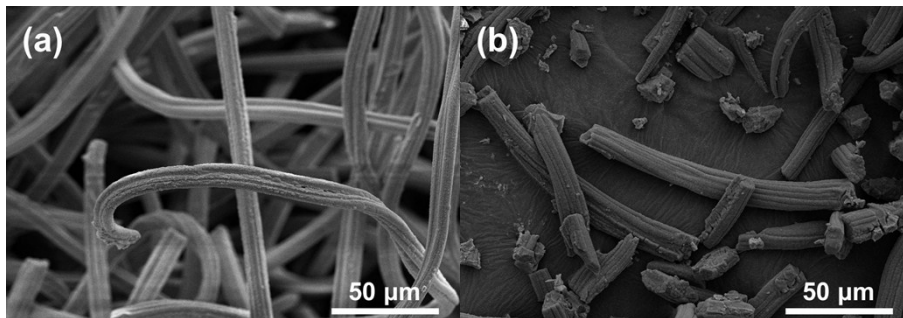

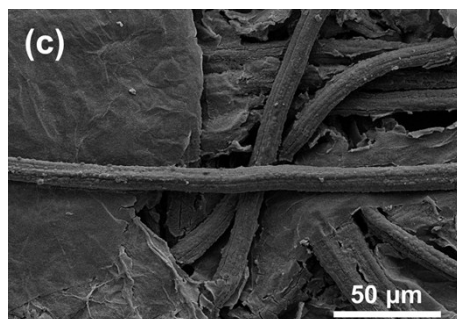

**Fig. S8** SEM images of C/SnO<sub>2</sub> (a), CG/SnO<sub>2</sub> (b), and CGN/SnO<sub>2</sub> electrode cycling at 260 μA cm<sup>-2</sup> after 60 cycles.
